# Supplementary material
Source: Springer Nature journal article supplement (https://www.springermedizin.de/resource/supplementary/13058_2013_3420_MOESM13_ESM.pdf/9704130)

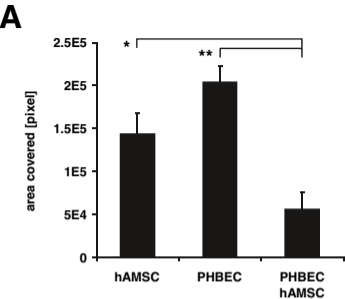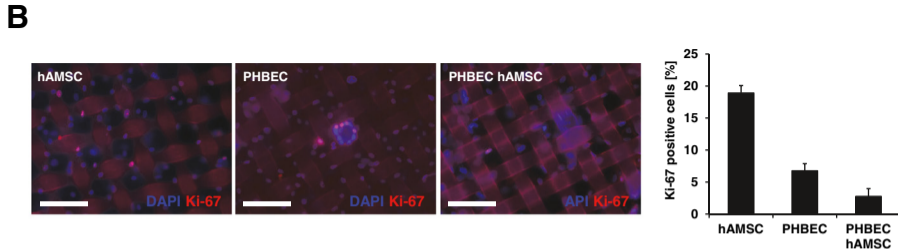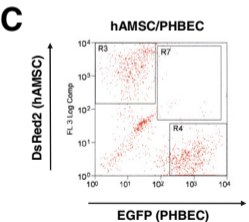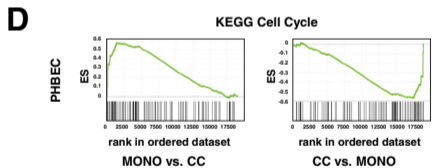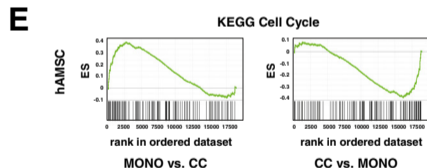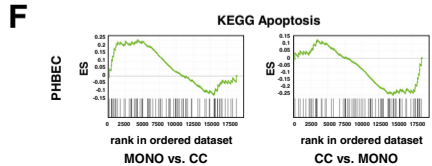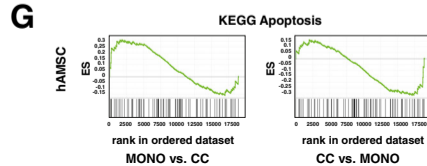

Supplement: MOESM13 [file 9704130]
